# Supplementary material for: Exploring Novel Functions of the Small GTPase Ypt1p under Heat-Shock by Characterizing a Temperature-Sensitive Mutant Yeast Strain, ypt1-G80D
Source: PubMed Central journal article supplement (PMC6337079; doi:10.3390/ijms20010132), 2019-01-01
Supplement: ijms-20-00132-s001.pdf [file ijms-20-00132-s001.pdf]

1 Supplementary Materials:

2

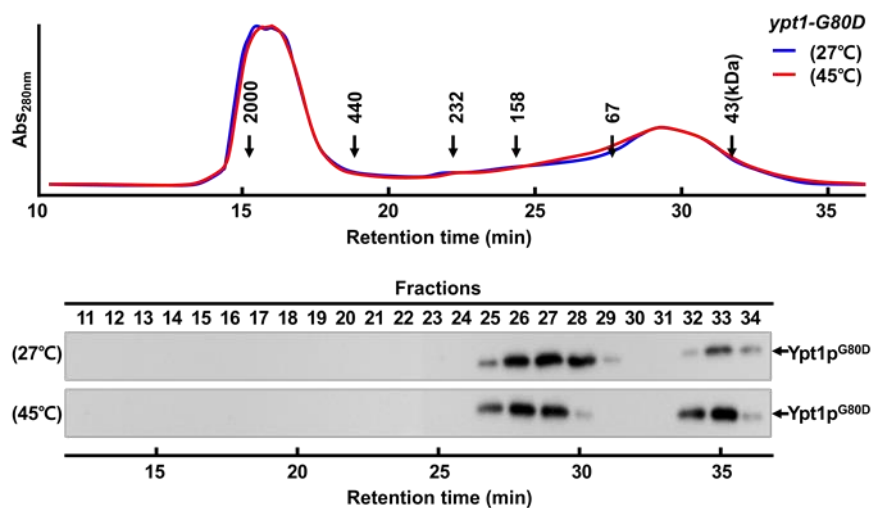

3

4 **Figure S1. Heat-Shock does not Induce Changes in the Molecular State of Ypt1p<sup>G80D</sup>.** Mutant *ypt1-G80D* cells  
5 were grown in YPD medium ( $1 \times 10^8$  cells/ml) and incubated at 27°C or 45°C for 45 min. Subsequently, total  
6 cytosolic extracts of the cells were subjected to SEC analysis. The upper panel shows traces of the resolved  
7 protein peaks in the SEC analysis (upper image), and the lower panel shows immunoblot detection of Ypt1p<sup>G80D</sup>  
8 in the corresponding fractions after SDS-PAGE. A 2.5 mg aliquot of total protein was applied to the SEC column,  
9 and 30  $\mu$ l of each fraction was subjected to SDS-PAGE. Ypt1p<sup>G80D</sup> was detected with a polyclonal anti-Ypt1p  
10 antibody.

11

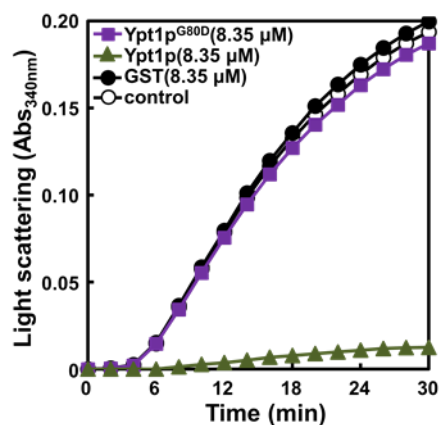

12

13 **Figure S2. Ypt1p has Molecular Chaperone Activity, but Ypt1p<sup>G80D</sup> does not.** For the chaperone activity assay,  
14 light scattering was monitored at 340 nm over a 15 min incubation period. (C) Solutions of 1 μM CS alone (-○-) or with 8.35 μM GST (-●-), Ypt1p (-▲-), or Ypt1p<sup>G80D</sup> (-■-) in 50 mM HEPES (pH 8.0) were incubated in a spectrophotometer cell at 43°C. Shown are representative data out of at least three independent experiments.

16

17

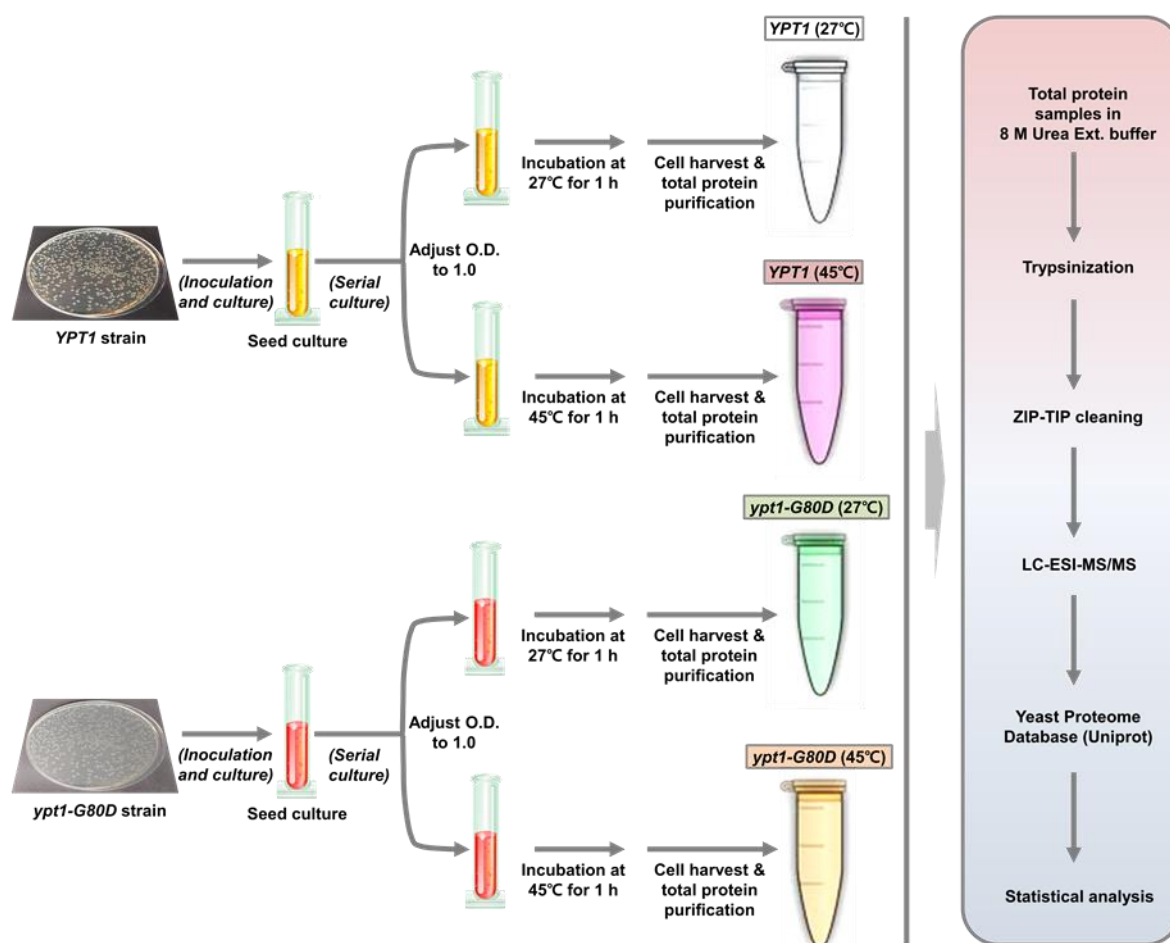

18

19 Figure S3. Experimental Workflow for the LC/MS Analysis Performed to Identify Putative Targets of Ypt1p  
20 Chaperone Activity.

21

22

Table S1. List of Heat-Shock-Induced Proteins that Accumulated in *YPT1* Cells but not *ypt1-G80D* Cells.

| Rank | Accession | % Coverage | # PSMs | # Peptides | MW [kDa] | Protein name                         | Description                                                                      |
|------|-----------|------------|--------|------------|----------|--------------------------------------|----------------------------------------------------------------------------------|
| 1    | E7Q0L2    | 48.04      | 53     | 25         | 68.9     | Ssa1p                                | Heat shock protein 70 family, ATP binding                                        |
| 2    | E7Q5S7    | 61.06      | 37     | 18         | 54.8     | ATP synthase subunit beta            | ATPase alpha/beta chains family, ATP hydrolysis coupled proton transport         |
| 3    | P00817    | 53.31      | 20     | 10         | 32.3     | Inorganic pyrophosphatase            | PPase family, phosphate-containing compound metabolic process                    |
| 4    | B3LNR6    | 68.55      | 18     | 10         | 30.4     | Porin                                | Voltage-gated anion channel activity                                             |
| 5    | E7NN07    | 27.03      | 16     | 12         | 84.5     | Eft2p                                | GTPase activity, GTP binding                                                     |
| 6    | E7K9H0    | 34.85      | 14     | 8          | 50.8     | Glucose-6-phosphate isomerase        | GPI family, Gluconeogenesis                                                      |
| 7    | E7NEM0    | 23.5       | 12     | 8          | 61.3     | Ssa3p                                | Heat shock protein 70 family, ATP binding                                        |
| 8    | C8ZAJ3    | 39.6       | 8      | 6          | 27.9     | Rhr2p                                | The haloacid dehydrogenase (HAD)-like hydrolase                                  |
| 9    | E7KPS1    | 19.03      | 7      | 6          | 42.7     | Om45p                                | None                                                                             |
| 10   | A6ZY0     | 19.37      | 6      | 3          | 24.2     | ADK1 (Adenylate kinase)              | Reversible transfer of the terminal phosphate group between ATP and AMP          |
| 11   | C8Z3Y1    | 11.41      | 5      | 4          | 58.7     | Ach1p                                | Acetyl-CoA metabolic process                                                     |
| 12   | B5VMN8    | 13.72      | 5      | 4          | 59.2     | YKR097Wp-like protein                | Gluconeogenesis, phosphoenolpyruvate carboxykinase (ATP) activity                |
| 13   | E7KXK4    | 11.28      | 5      | 4          | 57.4     | Thr4p                                | Cellular amino acid metabolic process, pyridoxal phosphate binding               |
| 14   | E7QFS8    | 10.6       | 4      | 3          | 47.7     | 6-phosphogluconate dehydrogenase     | Pentose-phosphate shunt, NADP binding                                            |
| 15   | B3LTX2    | 3.16       | 3      | 2          | 114.3    | Alpha-ketoglutarate dehydrogenase    | Tricarboxylic acid cycle                                                         |
| 16   | B3RH70    | 36.07      | 3      | 3          | 24.3     | Carboxypeptidase Y inhibitor         | Carboxypeptidase activity                                                        |
| 17   | C8Z3T2    | 22.99      | 2      | 2          | 29.5     | Prx1p                                | Antioxidant activity, peroxiredoxin activity                                     |
| 18   | E7NGN8    | 12.8       | 2      | 2          | 29.1     | Ses1p                                | Serine-tRNA ligase activity, ATP binding                                         |
| 19   | P17536    | 17.59      | 2      | 2          | 23.5     | Tropomyosin-1                        | Actin filament bundle assembly                                                   |
| 20   | B5VID1    | 9.36       | 2      | 2          | 42.1     | YGL202Wp-like protein                | Biosynthetic process, pyridoxal phosphate binding                                |
| 21   | E7KS25    | 16.14      | 2      | 2          | 28.0     | Transaldolase                        | Pentose-phosphate shunt, carbohydrate degradation                                |
| 22   | E7LWQ4    | 4.07       | 2      | 2          | 64.1     | Sdh1p                                | Electron transport chain, oxidoreductase activity                                |
| 23   | E7Q1Q6    | 27.5       | 2      | 2          | 17.0     | Atp16p                               | ATP synthesis coupled proton transport, proton-transporting ATP synthase complex |
| 24   | P28241    | 11.11      | 2      | 2          | 39.7     | IDH2 (isocitric dehydrogenase 2)     | Oxidoreductase, tricarboxylic acid cycle                                         |
| 25   | A6ZLW7    | 1.62       | 1      | 1          | 84.5     | Putative uncharacterized protein     | Trehalose biosynthetic process, catalytic activity                               |
| 26   | B5VE05    | 15.34      | 1      | 1          | 17.9     | YBR039Wp-like protein                | ATP synthesis coupled proton transport, proton-transporting ATP synthase complex |
| 27   | B5VHZ0    | 7.72       | 1      | 1          | 37.2     | YFL037Wp-like protein                | GTPase activity, microtubule-based process                                       |
| 28   | E7KMC6    | 19.09      | 1      | 1          | 12.5     | Cytochrome b-c1 complex subunit 7    | Mitochondrial electron transport, ubiquinol to cytochrome c                      |
| 29   | N1NWQ7    | 18.67      | 1      | 1          | 8.6      | Pbi2p                                | Serine-type endopeptidase activity, negative regulation of catalytic activity    |
| 30   | A6ZR65    | 2.43       | 1      | 1          | 122.5    | KAP123 (Karyopherin beta 4)          | Intracellular protein transport                                                  |
| 31   | A6ZW86    | 1.6        | 1      | 1          | 172.9    | REV3 (DNA polymerase)                | DNA-directed DNA polymerase activity                                             |
| 32   | A6ZYB0    | 1.26       | 1      | 1          | 152.9    | Putative uncharacterized protein     | Cortical protein anchoring, phospholipid binding                                 |
| 33   | A7A0P5    | 2.48       | 1      | 1          | 46.3     | SOF1 (Conserved protein)             | Contains WD repeat domains                                                       |
| 34   | A7A165    | 3.88       | 1      | 1          | 46.5     | IDP2 (isocitrate dehydrogenase)      | Oxidoreductase, tricarboxylic acid cycle                                         |
| 35   | B3LQM7    | 4.52       | 1      | 1          | 41.7     | Branched chain a.a. aminotransferase | L-isoleucine transaminase activity                                               |
| 36   | B5VDT3    | 11.7       | 1      | 1          | 21.1     | YBL050Wp-like protein                | Intracellular protein transport                                                  |
| 37   | B5VJ70    | 7.71       | 1      | 1          | 49.3     | YGR124Wp-like protein                | Asparagine biosynthetic process, asparagine synthase activity                    |
| 38   | B5VP02    | 5.63       | 1      | 1          | 45.2     | YML128Cp-like protein                | Contains Stress_response_1sh1 domain                                             |
| 39   | B5VTE6    | 1.09       | 1      | 1          | 105.0    | YPL016Wp-like protein                | Contains ARID domain, DNA binding                                                |
| 40   | C8ZII1    | 5.33       | 1      | 1          | 27.7     | Rpl7bp                               | Ribosomal protein L30P family, Ribonucleoprotein                                 |
| 41   | E7KJ59    | 8.56       | 1      | 1          | 33.7     | Bts1p                                | FPP/GGPP synthase family, isoprenoid biosynthetic process                        |
| 42   | E7KR27    | 15.91      | 1      | 1          | 14.9     | Tma19p                               | Contains Translationally controlled tumor protein (TCTP) domain                  |
| 43   | E7KW07    | 6.14       | 1      | 1          | 24.0     | Enolase                              | Phosphopyruvate hydratase activity, carbohydrate degradation, glycolysis         |
| 44   | E7NG58    | 7.41       | 1      | 1          | 24.0     | Ypr1p                                | Oxidoreductase activity, contains Aldo_ket_red domain                            |
| 45   | E7NNH1    | 14.8       | 1      | 1          | 20.5     | Erg10p                               | Transferase activity, transferring acyl groups other than amino-acyl groups      |
| 46   | E7Q1X0    | 2.31       | 1      | 1          | 72.6     | Mbp1p                                | Sequence-specific DNA binding transcription factor activity                      |
| 47   | E7Q465    | 4.51       | 1      | 1          | 54.1     | Cys4p                                | Cystathionine beta-synthase activity, cysteine biosynthetic process from serine  |
| 48   | G2WKH0    | 5.15       | 1      | 1          | 60.1     | K7_Ade17bp                           | IMP cyclohydrolase activity, purine nucleotide biosynthetic process              |
| 49   | P50263    | 20.25      | 1      | 1          | 8.9      | SIP18                                | Phospholipid binding, cellular response to water deprivation                     |

23

24

PSM, peptide-spectrum match. MW, molecular weight.
